# Supplementary material for: Healthcare seeking behavior of patients with influenza like illness: comparison of the summer and winter influenza epidemics
Source: Springer Nature journal article supplement (doi:10.1186/s12879-016-1821-7), 2016-09-20
Supplement: MOESM3 [file 10720832]

Additional file 3. Sensitivity analysis on healthcare seeking behavior of the adult respondents with influenza like illness using the alternative case definitions.

|                                         | 2014 Summer |                   | 2015 Winter |                   | <i>p</i> -value <sup>a</sup> |
|-----------------------------------------|-------------|-------------------|-------------|-------------------|------------------------------|
|                                         | No.         | %                 | No.         | %                 |                              |
| <b>ILI</b>                              | 91          |                   | 143         |                   |                              |
| <b>Self-medication</b>                  | 41          | 45.6 <sup>c</sup> | 42          | 29.2 <sup>c</sup> | <b>0.011</b>                 |
| <b>Sought medical care <sup>b</sup></b> | 40          | 44.0 <sup>c</sup> | 67          | 46.9 <sup>c</sup> | 0.665                        |
| <b>Private</b>                          |             |                   |             |                   |                              |
| A&E                                     | 6           | 15.0              | 10          | 14.9              | 0.911                        |
| Western clinic                          | 25          | 62.5              | 45          | 67.2              | 0.515                        |
| TCM                                     | 13          | 32.5              | 16          | 23.9              | 0.466                        |
| Hospitalization                         | 2           | 5.0               | 1           | 1.5               | 0.247                        |
| <b>Public</b>                           |             |                   |             |                   |                              |
| A&E                                     | 4           | 10.0              | 3           | 4.5               | 0.434                        |
| Western clinic                          | 11          | 27.5              | 16          | 23.9              | 0.813                        |
| TCM                                     | 0           | 0.0               | 1           | 1.5               | 1.000                        |
| Hospitalization                         | 2           | 5.0               | 2           | 3.0               | 1.000                        |

A&E: accident and emergency department; TCM: traditional Chinese medicine.

<sup>a</sup> *p*-value of Chi-square tests

<sup>b</sup> Different types or multiple episodes of medical care events reported by one participant were counted as only one episode.

<sup>c</sup> Percentage of healthcare seeking behavior in total number of ILI.
