# Supplementary material for: Healthcare seeking behavior of patients with influenza like illness: comparison of the summer and winter influenza epidemics
Source: Springer Nature journal article supplement (doi:10.1186/s12879-016-1821-7), 2016-09-20
Supplement: MOESM4 [file 10720832]

Additional file 4. Symptoms and signs of individuals with influenza like illness who sought medical care.

| <b>Symptoms</b>     | <b>Medical care seeking</b> |          |
|---------------------|-----------------------------|----------|
|                     | <b>n</b>                    | <b>%</b> |
| <b>Adults</b>       |                             |          |
| Fever               | 15                          | 71.4     |
| Chills              | 18                          | 45.0     |
| Headache            | 79                          | 43.6     |
| Myalgia             | 100                         | 41.3     |
| Cough               | 96                          | 51.1     |
| Shortness of breath | 30                          | 65.2     |
| Dizziness of breath | 45                          | 48.9     |
| Runny or stuff nose | 96                          | 51.3     |
| Sore throat         | 89                          | 48.9     |
| Diarrhoea           | 31                          | 39.7     |
| Low back pain       | 67                          | 47.2     |
| <b>Children</b>     |                             |          |
| Fever               | 31                          | 72.1     |
| Sleepy              | 5                           | 41.7     |
| Sore throat         | 41                          | 64.1     |
| Runny nose          | 47                          | 54.0     |
| Cough               | 48                          | 50.5     |
| Diarrhoea           | 15                          | 60.0     |
| Vomit               | 12                          | 92.3     |
| Dehydration         | 2                           | 100.0    |
